# Supplementary material for: Emerging Cryptococcus gattii species complex infections in Guangxi, southern China
Source: PubMed Central journal article supplement (PMC7449396; doi:10.1371/journal.pntd.0008493), 2020-08-26

S1

PC2

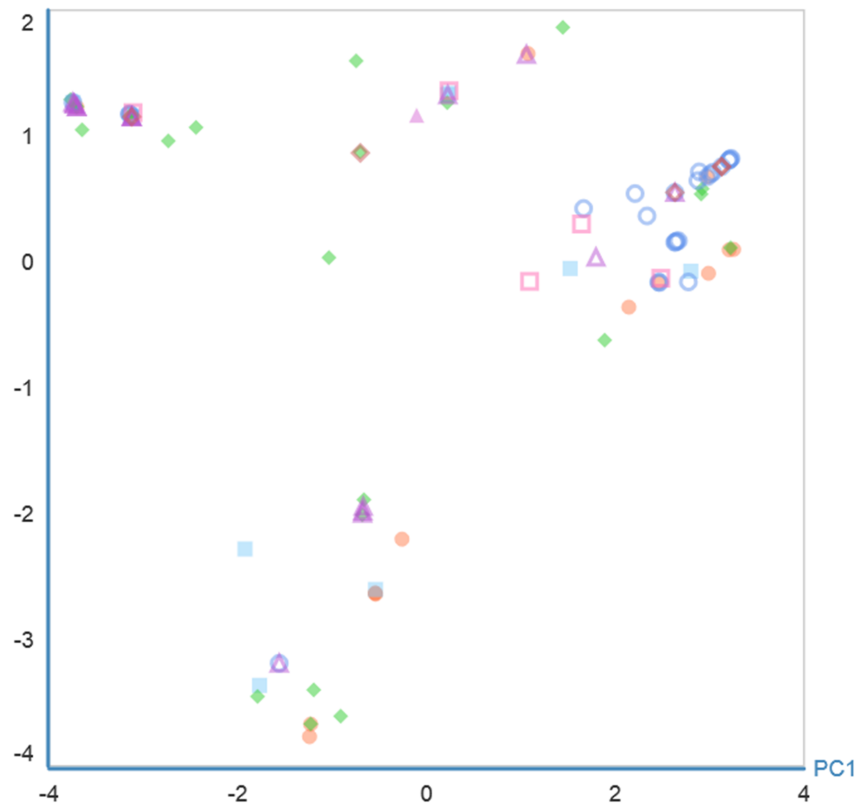

(a)

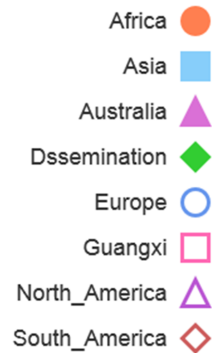

PC2

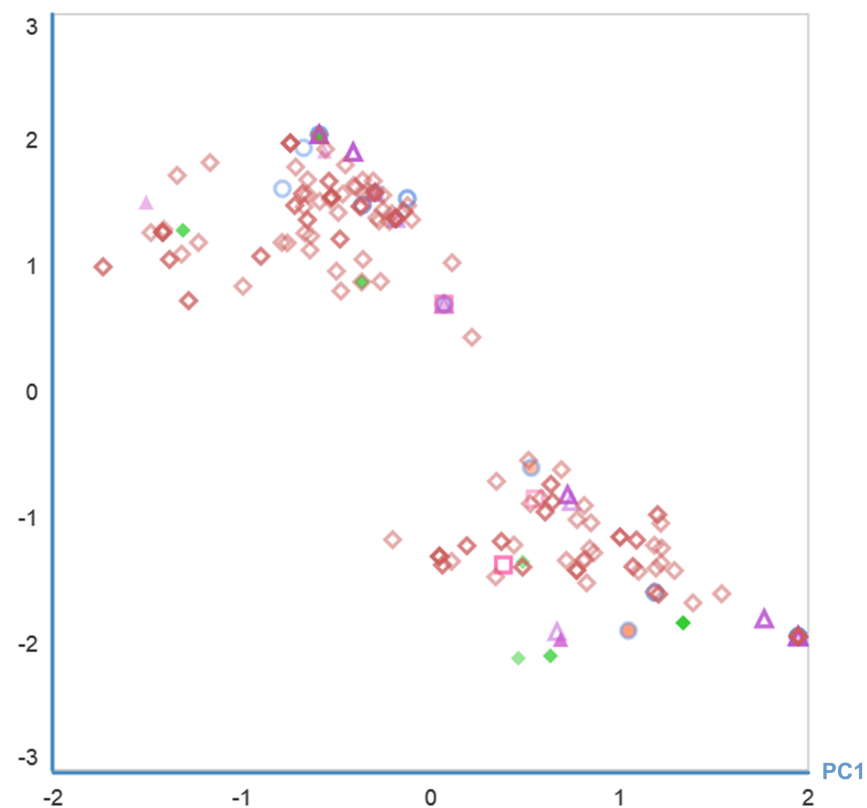

(b)

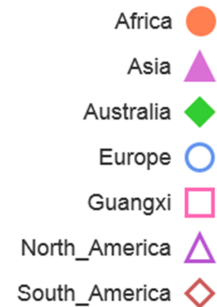

Supplement: pntd.0008493.s001.pdf [file pntd.0008493.s001.pdf]
